# Supplementary material for: Accelerated photocatalytic hydrogen evolution over donor–acceptor type graphitic carbon nitride (g-CN) with simultaneous modification of pyrimidine and thiophene rings
Source: Royal Society of Chemistry journal article supplement (doi:10.1039/d4cy01401d), 2024-12-03
Supplement: d4cy01401d1.pdf [file d4cy01401d1.pdf]

## Electronic Supplementary Information

**Accelerated photocatalytic hydrogen evolution over donor-acceptor type graphitic carbon nitride**

**(g-CN) with simultaneous modification of pyrimidine and thiophene rings**

Shigen Watanabe,<sup>\*a</sup> Hideyuki Katsumata,<sup>\*a</sup> Monir Uzzaman,<sup>a</sup> Ikki Tateishi,<sup>b</sup> Mai Furukawa,<sup>a</sup> and Satoshi Kaneco<sup>a</sup>

<sup>a</sup> Department of Applied Chemistry, Graduate School of Engineering, Mie University, Tsu, Mie 514-8507, Japan.

<sup>b</sup> Center for Global Environment Education & Research, Mie University, Tsu, Mie 514-8507, Japan.

\*Email: 423M364@m.mie-u.ac.jp (S.W.); hidek@chem.mie-u.ac.jp (H.K)

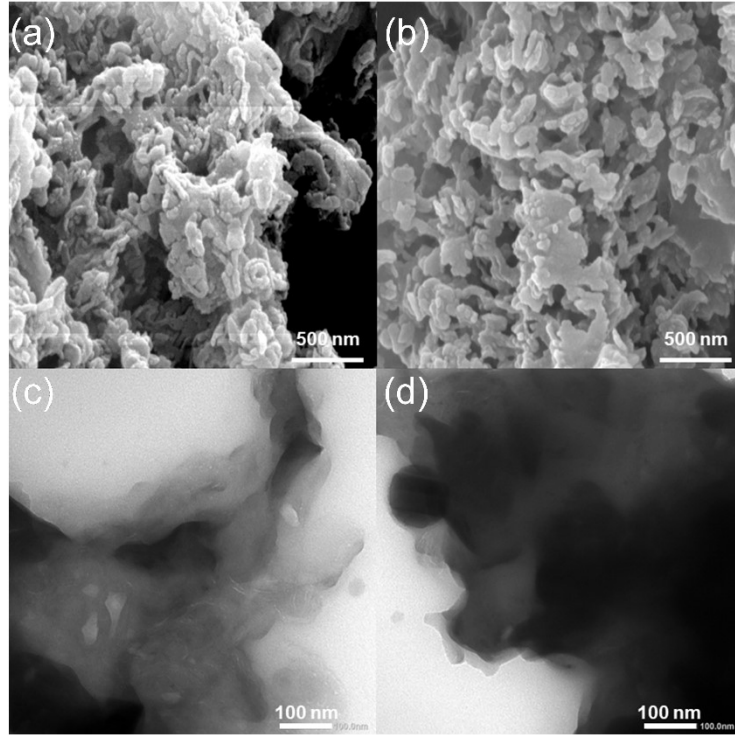

Fig. S1. The SEM images of (a) UPDB-5, and (b) UPDB-30. The TEM images of (c) UPDB-5, and (d) UPDB-30.

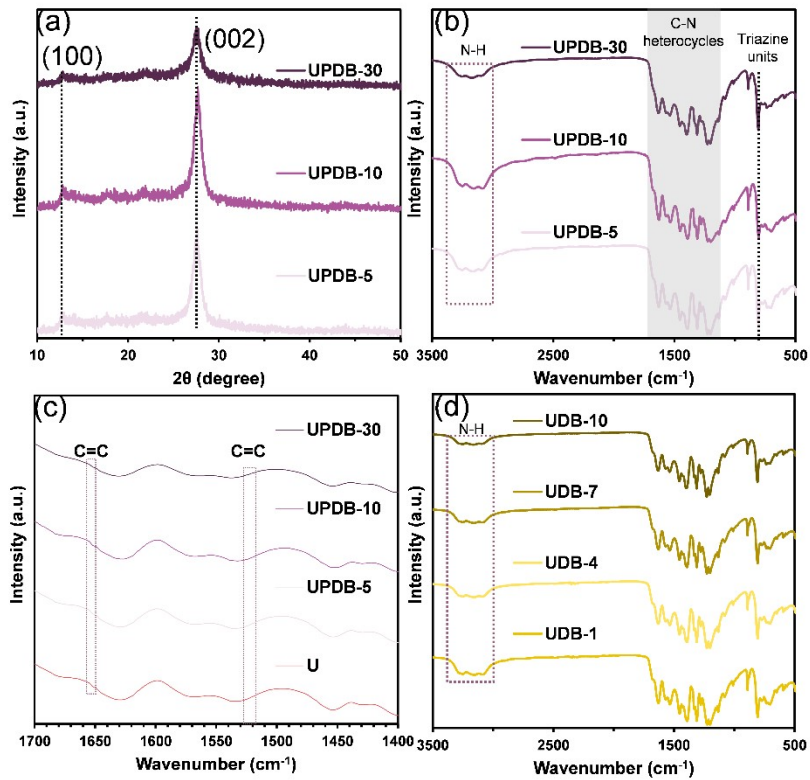

Fig. S2. (a) XRD patterns of each sample. FT-IR spectra of (b) each g-CN, (c) within 1400-1700  $\text{cm}^{-1}$  range, and (d) effect of varying DB amounts.

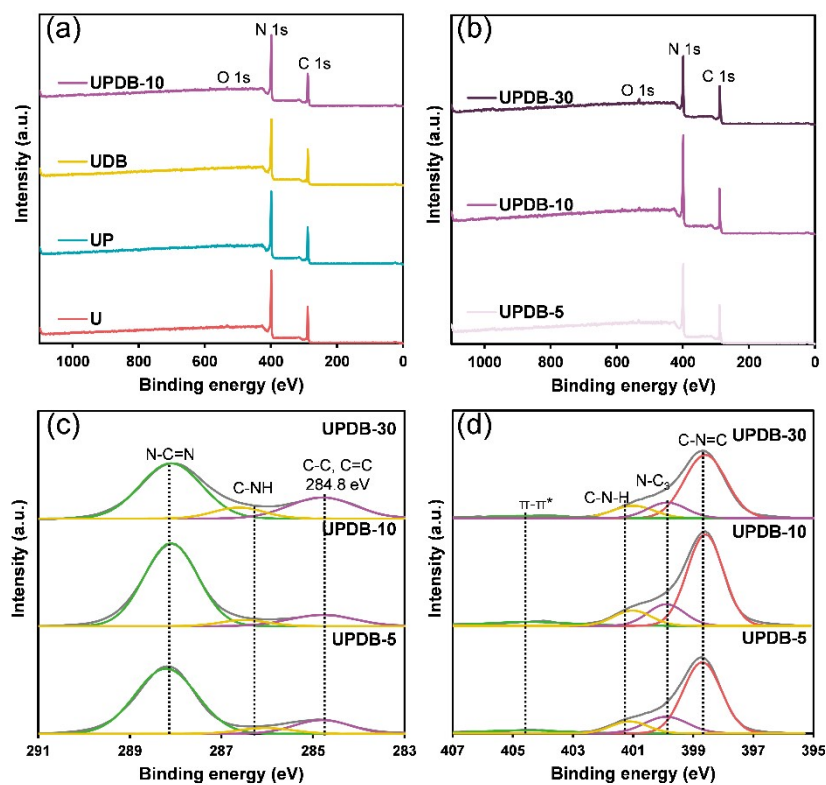

Fig. S3. The XPS survey spectra of (a) each precursor, and (b) amounts of pyrimidine. The XPS narrow spectra of (c) C 1s, and (d) N 1s.

Table S1. Surface atomic ratios of U, UP, UDB, UPDB-5, UPDB-10, and UPDB-30.

| Sample  | C (%) | N (%) | C/N molar ratio |
|---------|-------|-------|-----------------|
| U       | 42.0  | 58.0  | 0.724           |
| UP      | 44.0  | 56.0  | 0.786           |
| UDB     | 42.9  | 57.1  | 0.751           |
| UPDB-5  | 44.8  | 55.2  | 0.812           |
| UPDB-10 | 44.7  | 55.3  | 0.808           |
| UPDB-30 | 46.8  | 53.2  | 0.880           |

Table S2. Proportion of each peak in C 1s and N 1s of each sample.

| Sample | C 1s (%) |          |      | N 1s (%)    |       |       |                  |
|--------|----------|----------|------|-------------|-------|-------|------------------|
|        | N=C-N    | C=C, C-C | C-NH | $\pi-\pi^*$ | C-N=C | C-N-H | N-C <sub>3</sub> |
| U      | 90.4     | 3.6      | 5.9  | 5.5         | 70.4  | 13.8  | 10.2             |
| UP     | 82.8     | 9.6      | 7.6  | 4.5         | 71.2  | 7.0   | 17.2             |

|         |      |      |      |     |      |      |      |
|---------|------|------|------|-----|------|------|------|
| UDB     | 92.5 | 4.9  | 2.6  | 6.9 | 67.5 | 7.4  | 18.2 |
| UPDB-5  | 78.8 | 15.1 | 6.1  | 6.3 | 65.7 | 10.7 | 17.3 |
| UPDB-10 | 81.0 | 13.7 | 5.3  | 6.8 | 66.1 | 11.4 | 15.8 |
| UPDB-30 | 63.4 | 26.2 | 10.4 | 5.3 | 66.6 | 13.1 | 15.1 |

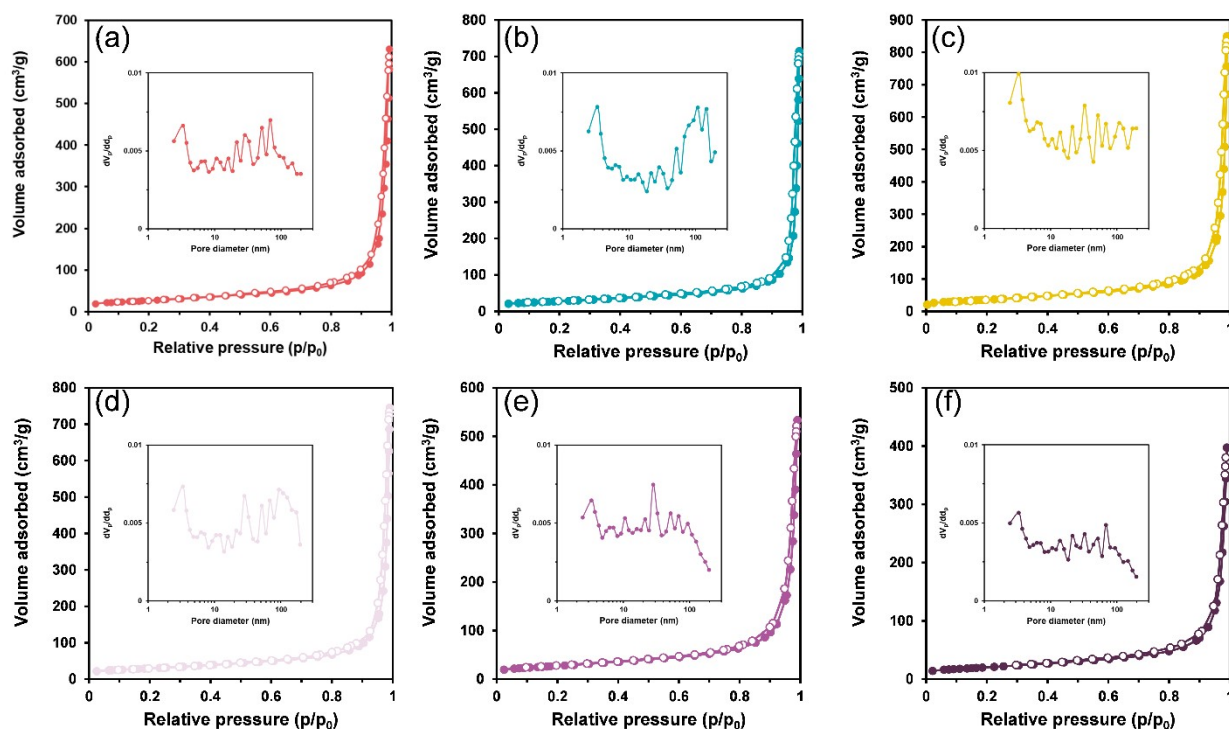

Fig. S4. The BET surface areas from N<sub>2</sub> adsorption-desorption isotherms and the BJH pore diameter distribution plots of (a) U, (b) UP, (c) UDB (d) UPDB-5, (e) UPDB-10, and (f) UPDB-30.

Table S3. BET specific surface area, total pore volume, and average pore diameter of U, UP, UDB, UPDB-5, UPDB-10, and UPDB-30.

| Sample  | S <sub>BET</sub> (m <sup>2</sup> g <sup>-1</sup> ) | Total pore volume (cm <sup>3</sup> g <sup>-1</sup> ) | Average pore diameter (nm) |
|---------|----------------------------------------------------|------------------------------------------------------|----------------------------|
| U       | 96.3                                               | 0.92                                                 | 38.2                       |
| UP      | 97.0                                               | 1.10                                                 | 45.5                       |
| UDB     | 128                                                | 1.24                                                 | 38.8                       |
| UPDB-5  | 105.2                                              | 1.13                                                 | 43.0                       |
| UPDB-10 | 97.0                                               | 0.82                                                 | 33.7                       |
| UPDB-30 | 73.0                                               | 0.60                                                 | 33.0                       |

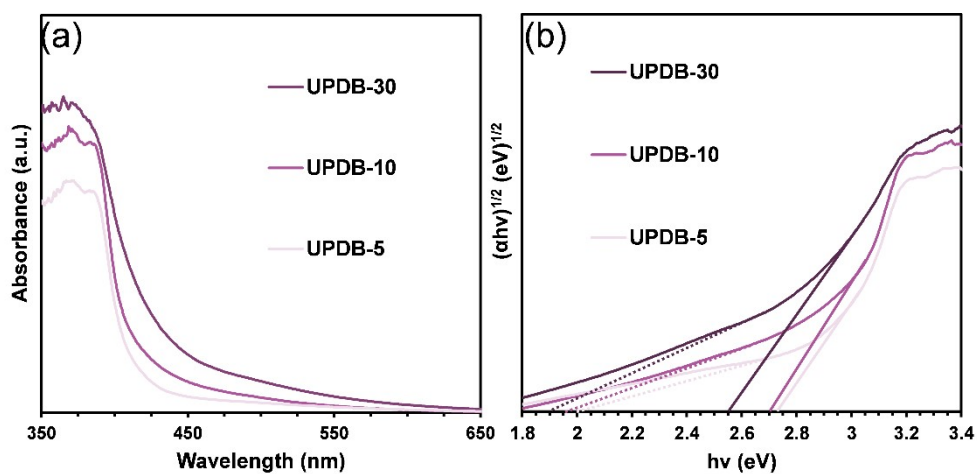

Fig. S5. (a) The Uv-Vis DRS spectra, and (b) tauc plots of each g-CN.

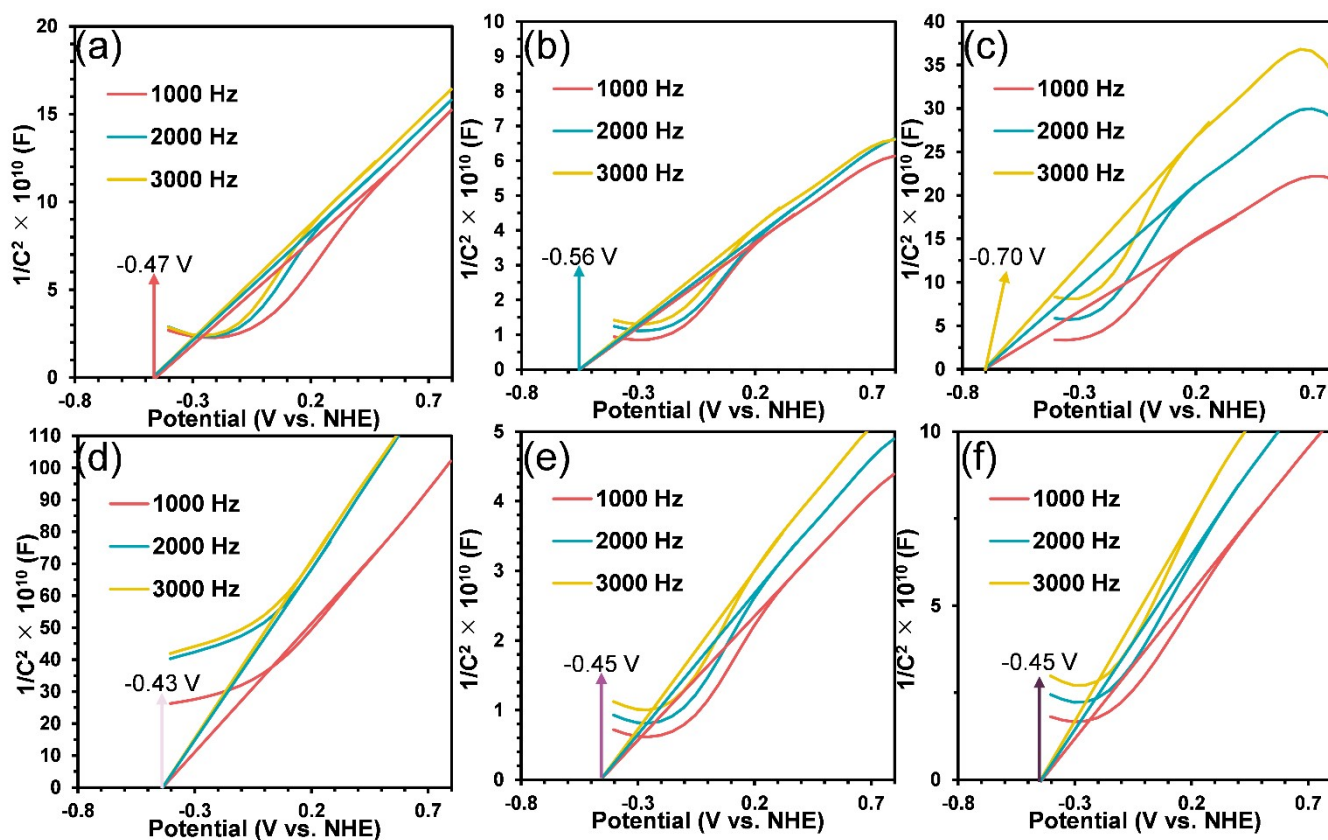

Fig. S6. Mott-Schottky plots of (a) U, (b) UP, (c) UDB (d) UPDB-5, (e) UPDB-10, and (f) UPDB-30.

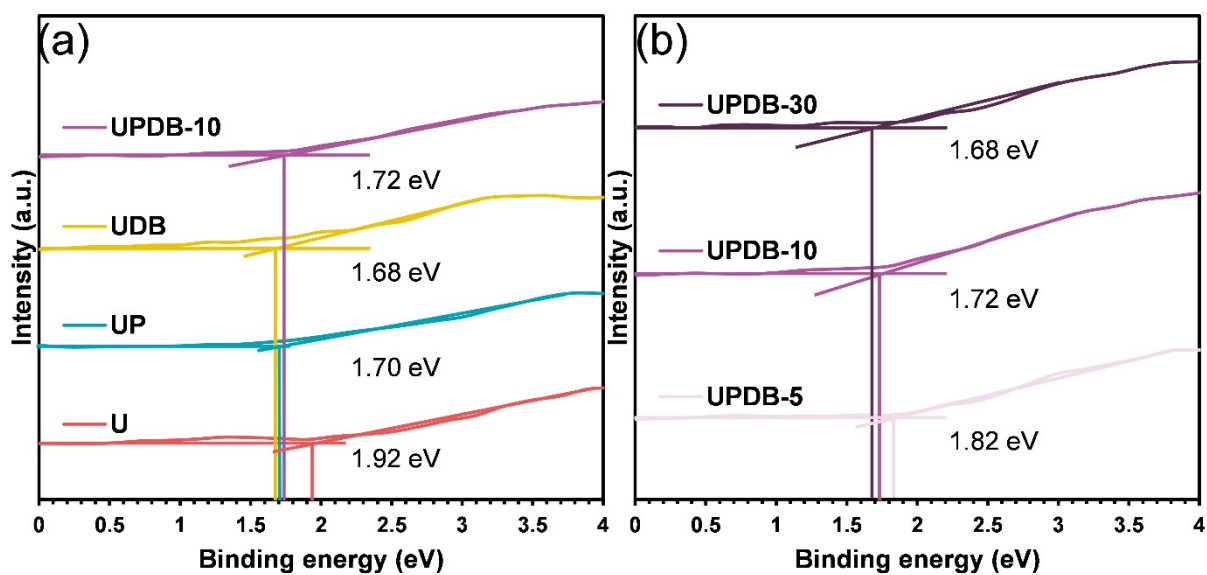

Fig. S7. VB XPS of (a) U, UP, UDB, and UPDB-10, (b) UPDB-5, UPDB-10, and UPDB-30.

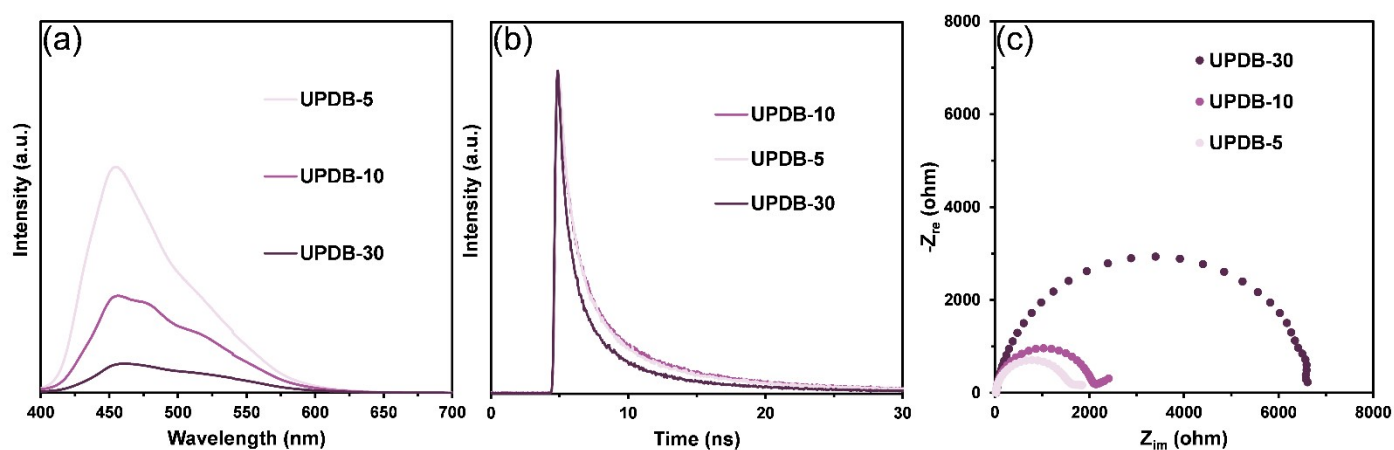

Fig. S8. (a) PL spectra, (b) TRPL spectra and (c) EIS Nyquist plots of UPDB-5, UPDB-10, and UPDB-30.

Table S4. Average lifetimes of U, UP, UDB, UPDB-5, UPDB-10, and UPDB-30.

| Sample |          | Lifetime (ns) | $R_A$ % | Average lifetime (ns) |
|--------|----------|---------------|---------|-----------------------|
| U      | $\tau_1$ | 0.74          | 21.10   | 4.58                  |
|        | $\tau_2$ | 2.51          | 46.06   |                       |
|        | $\tau_3$ | 9.96          | 32.85   |                       |
| UP     | $\tau_1$ | 0.21          | 9.65    |                       |

|         |          |      |       |      |
|---------|----------|------|-------|------|
|         | $\tau_2$ | 2.11 | 30.61 | 5.97 |
|         | $\tau_3$ | 8.88 | 59.75 |      |
| UDB     | $\tau_1$ | 0.33 | 11.28 |      |
|         | $\tau_2$ | 1.52 | 38.28 | 3.84 |
|         | $\tau_3$ | 6.34 | 50.44 |      |
| UPDB-5  | $\tau_1$ | 0.33 | 12.05 |      |
|         | $\tau_2$ | 2.02 | 36.99 | 5.20 |
|         | $\tau_3$ | 8.67 | 50.95 |      |
| UPDB-10 | $\tau_1$ | 0.23 | 11.84 |      |
|         | $\tau_2$ | 2.10 | 34.29 | 5.43 |
|         | $\tau_3$ | 8.70 | 53.88 |      |
| UPDB-30 | $\tau_1$ | 0.33 | 16.30 |      |
|         | $\tau_2$ | 1.94 | 39.89 | 4.45 |
|         | $\tau_3$ | 8.27 | 43.81 |      |

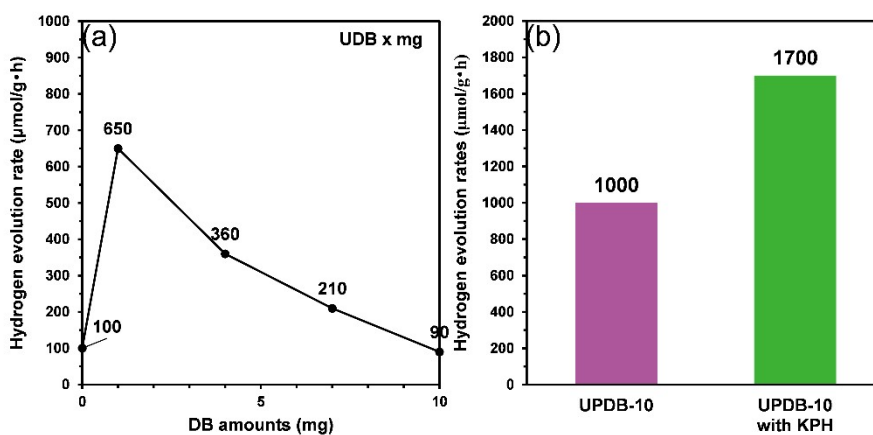

Fig. S9. Photocatalytic hydrogen evolution of (a) amount of DB, and (b) effect of KPH.

Table S5. Comparison of photocatalytic hydrogen evolution activity of carbon nitride-based photocatalysts.

| <b>Photocatalysts<br/>(mg/mL)</b> | <b>Co-catalysts</b> | <b>Light source</b>                            | <b>H<sub>2</sub> evolution<br/>(<math>\mu\text{mol g}^{-1} \text{h}^{-1}</math>)</b> | <b>AQY (%)<br/>(420 nm)</b> | <b>Ref.</b>      |
|-----------------------------------|---------------------|------------------------------------------------|--------------------------------------------------------------------------------------|-----------------------------|------------------|
| CNS-H (0.71)                      | 3 wt.% Pt           | 50 W LED<br>( $\geq 380$ nm)                   | 17700                                                                                | 16.68 %                     | [S1]             |
| CuCN (0.5)                        | 3 wt.% Pt           | 300 W Xe<br>( $\geq 420$ nm)                   | 2231.8                                                                               | 2.93 %                      | [S2]             |
| NCN-2AP-X<br>(0.25)               | 1 wt.% Pt           | 300 W Xe<br>( $\geq 420$ nm)                   | 2550                                                                                 | 9.79 %                      | [S3]             |
| HCN-EDA<br>(0.25)                 | 0.2 wt.% Pt         | 5 W LED<br>White light                         | 52160                                                                                | 31.6 %                      | [S4]             |
| PhSO-TCNx<br>(0.4)                | 3 wt.% Pt           | 300 W Xe<br>( $\geq 420$ nm)                   | 8709                                                                                 | 12.0 %                      | [S5]             |
| B,S-TCN (0.1)                     | 3 wt.% Pt           | 300 W Xe<br>( $\geq 400$ nm)                   | 9321                                                                                 | 5.3 %                       | [S6]             |
| <b>UPDB-10 (1)</b>                | <b>2 wt.% Pt</b>    | <b>300 W Xe<br/>(<math>\geq 420</math> nm)</b> | <b>1000</b>                                                                          | <b>15.5%</b>                | <b>This work</b> |



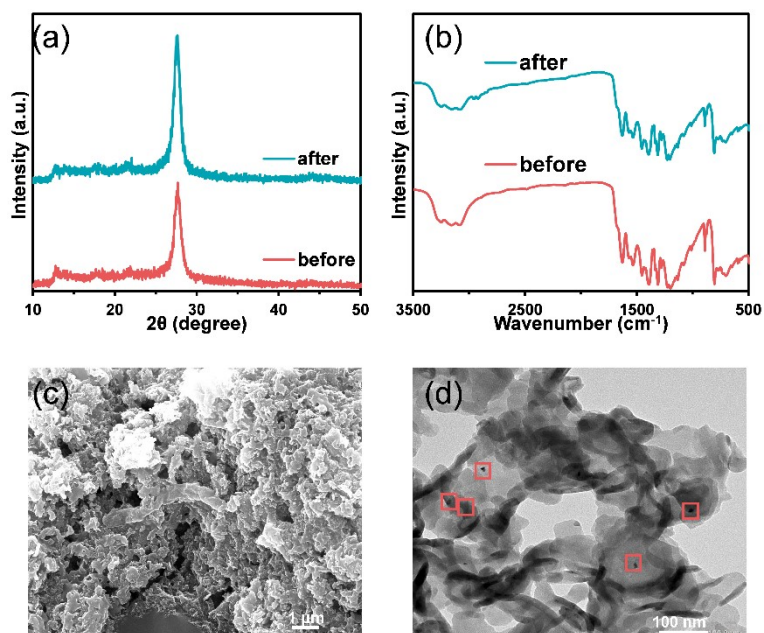

Fig. S10. (a) XRD patterns, (b) FT-IR spectra, (c) SEM image (10K), and (d) TEM image of UPDB-10 (50K) before and after photocatalytic reaction.

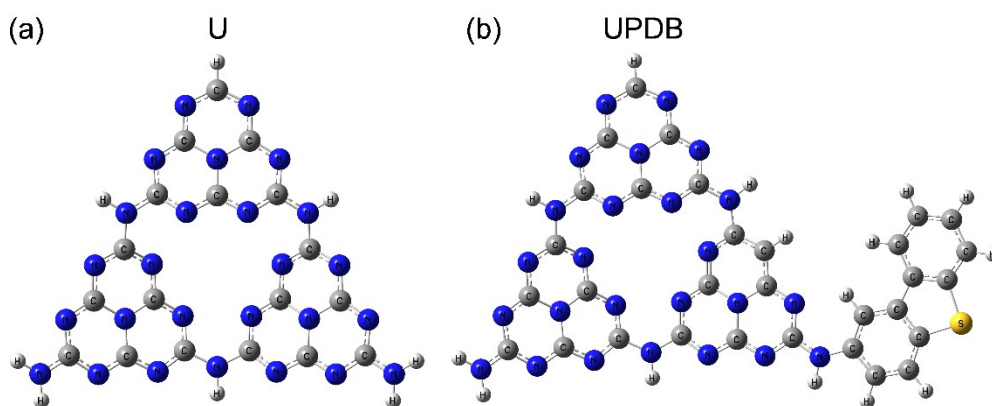

Fig. S11. Most stable optimized structure of (a) U and (b) UPDB, optimized at DFT/B3LYP/6-31g + (d, p) level of theory.

## References

- [S1] W. Chen, X. Zhao, Q. Zeng, L. Liu, P. Yang, S. Guo, J. Leng, M. Zhong, W. Hong and L. Zhang, *Fuel*, 2025, **381 (Part A)**, 133329.
- [S2] H. Zhang, Z. Liu, J. Fang and F. Peng, *Small*, DOI:10.1002/sml.202404929.
- [S3] B. Ye, H. Tang, Q. Liu, W. Wang, L. Wang and J. Hu, *Carbon*, 2023, **204**, 465–474.
- [S4] Z. Li, Y. Chen, J. Pei, X. Zhou, S. Chen and F. Sun, *ACS Catal.*, 2024, **14**, 12093–12101.
- [S5] M. Yu, W. Shao, G. Tai, J. Han, G. Wu and W. Xing, *Int. J. Hydrogen Energy*, 2024, **85**, 832–840.
- [S6] Z. Mo, Z. Miao, P. Yan, P. Sun, G. Wu, X. Zhu, C. Ding, Q. Zhu, Y. Lei and H. Xu, *J. Colloid Interface Sci.*, 2023, **645**, 525–532.
